# Supplementary material for: Genome-wide in situ exon capture for selective resequencing
Source: Springer Nature journal article supplement (doi:10.1038/ng.2007.42), 2007-11-04
Supplement: 41588_2007_BFng200742_MOESM22_ESM.pdf [file 41588_2007_BFng200742_MOESM22_ESM.pdf]

## Hodges et al., Supplementary Fig. 1

**A**

gTGGtAGGAGGTGTTTCTGAAAGAGG 2\_085  
 gTGGTAGGAGGTGTTTCTgAAAgAGG 6\_162  
 ggTaggAGGtGTTTCTGAAAGAGGAA 8\_019  
 GTGGTAGGGGTGTTTCTGAAAGAGGAA Reference  
**A/G rs12487705 chr3 45492763**

**B**

aGGCTGCACTTCTGGAGCGGaaAGcca 8\_140  
 gGGCTGCACTTCTGGAGcGGaaGaGa 8\_135  
 cTTCAGGAGcGGaagcCagcccgacg 5\_086  
 GGGCTGCACTTCTGGAGCGGAAGCCAGCCTGACG Reference  
**A/T rs4956924 chr5 235077**

**C**

TGCCGCCTCTCAGCcCtCAGTCCCCt 1\_123  
 TGCCGCCTCTCaGCCCTCcgTCCCCt 5\_041  
 TgCCGCCTCTCcGCCCTCaGTCCCCt 7\_132  
 TGCCGCCTCTCAGcCCcTcAGtCCCCt 8\_082  
 TGCCGCCTCTCAGACCTCAGTCCCCt Reference  
**A/C rs2780407 chr4 43498**

**D**

GgtggatGtGCAGTTAtTtCTCTGCc 2\_067  
 GgTGTatgTGCAGTTATTTCTCTGCc 3\_019  
 ggtgtatgtgcaGtTAtttCTCTgCc 4\_103  
 gGTGTatgtGCAGTTATTTCTCTGtc 7\_154  
 gTgCaGTTATTTCTCTTCCTTCTTTA 3\_164  
 GTGCAGtTATTTCTCTTCCTTCTTTA 4\_167  
 gtgcagttatttctcttcCttCttTA 8\_088  
 gTgCaGTTATTTCTCTTCCTTCTTTA 8\_141  
 GGTGTATGTGCAGTTATTTCTCTGCCTTCTTTA Reference

**E**

AGCCaaAGGAACCTTCAGAAGCTGAG 5\_177  
 AGCCaaAGGAACCTTCAGAAGCTGAG 8\_109  
 AGCTGTGACAGCAAAGAGGACCTGAG 6\_117  
 AGCCACAGGAACCTTCAGAAGCTGTGACAGCAAAGAGGACCTGAG Reference  
**G/T rs12530189 chr6 2628521**  
**A/T rs9883759 chr3 48438622**

**Supplementary Figure 1 SNP detection.** Five previously identified SNPs in dbSNP (build 126) detected from exon enriched 1G reads are displayed as examples of either homozygous SNPs (A,C) or heterozygous SNPs (B,D,E), with corresponding human reference genome alignment. Bases with quality scores less than 40 are in lower cases. SNP sites are shown in black. The relevant information from the dbSNP126 database is given in bold.

Supplementary Table 1. Oligonucleotides

---

|                      |                                            |
|----------------------|--------------------------------------------|
| Linker 1             | 5'-Pi-GAGGATCCAGAATTCTCGAGTT-3'            |
| Linker 2             | 5'-CTCGAGAATTCTGGATCCTC-3'                 |
| Sequencing<br>Primer | 5' -ACGCTCTTCCGATCTCTCGAGAATTCTGGATCCTC-3' |

---
